# Supplementary material
Source: PubMed Central journal article supplement (PMC6601073)
Supplement: 2018_201921-Disclosures_and_Contributions.pdf [file 2018_201921-Disclosures_and_Contributions.pdf]

Haematologica  
HAEMATOL/2018/201921  
Version 3

SDF1 $\alpha$ -induced chemotaxis of JAK2-V617F positive cells is dependent on Bruton's Tyrosine Kinase and its downstream targets PI3K/AKT, PLC $\gamma$ 1 and RhoA

Subbaiah Chary Nimmagadda, Stephanie Frey, Peter Müller, Denise Wolleschak, Söenke Weinert, Ulrich Keller, Bärbel Edelmann, and Thomas Fischer

Disclosures: None

Contributions: SCN and TF planned the study; SCN, SF, PM, SW, and BE performed the experiments and analyzed the data. DW and UK provided essential patient material and reagents. SCN and TF wrote the manuscript.
